# Supplementary material for: Liver X receptors regulate hepatic F4/80+CD11b+ Kupffer cells/macrophages and innate immune responses in mice
Source: PubMed Central journal article supplement (PMC6006359; doi:10.1038/s41598-018-27615-7), 2018-06-18
Supplement: 41598_2018_27615_MOESM1_ESM.pdf [file 41598_2018_27615_MOESM1_ESM.pdf]

## Supplementary Information

### **Liver X receptors regulate hepatic F4/80<sup>+</sup>CD11b<sup>+</sup> Kupffer cells/macrophages and innate immune responses in mice**

Kaori Endo-Umeda<sup>1</sup>, Hiroyuki Nakashima<sup>2</sup>, Shihoko Komine-Aizawa<sup>3</sup>, Naoki Umeda<sup>1</sup>, Shuhji Seki<sup>2</sup>, and Makoto Makishima<sup>1,\*</sup>

<sup>1</sup>Division of Biochemistry, Department of Biomedical Sciences, Nihon University School of Medicine, 30-1 Oyaguchi-kamicho, Itabashi-ku, Tokyo 173-8610, Japan

<sup>2</sup>Department of Immunology and Microbiology, National Defense Medical College, 3-2 Namiki, Tokorozawa, Saitama 359-8513, Japan

<sup>3</sup>Division of Microbiology, Department of Pathology and Microbiology, Nihon University School of Medicine, 30-1 Oyaguchi-kamicho, Itabashi-ku, Tokyo 173-8610, Japan

\*Corresponding author. e-mail: makishima.makoto@nihon-u.ac.jp

F4/80 (green)

CD11b (red)

WT

LXR $\alpha$ / $\beta$ -KO

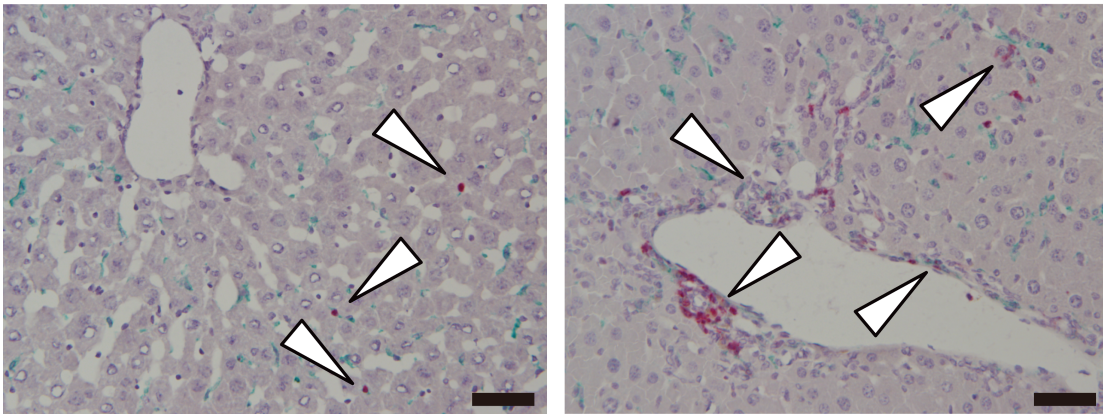

Supplementary Figure 1. Double immunostaining of F4/80 (green) and CD11b (red) in the liver of WT and LXR $\alpha$ / $\beta$ -KO mice. The open triangles indicate F4/80<sup>+</sup>CD11b<sup>+</sup> cells. Scale bar = 50  $\mu$ m.
